# Supplementary material for: A homochiral polar molecular piezoelectric material with phase transition and high piezoelectricity precisely designed by cyanomethyl group substitution
Source: Royal Society of Chemistry journal article supplement (doi:10.1039/d4ce00023d), 2024-01-01
Supplement: d4ce00023d1.pdf [file d4ce00023d1.pdf]

## Supporting Information

### A homochiral polar molecular piezoelectric material with phase transition and high piezoelectricity precisely designed by cyanomethyl group substitution†

Shu-Jing Yang, Yong-Ju Bai, Jun-Chao Qi, Xiao-Yun Huang, Xin Shen, Yan-Zi Lu, Zhang-Tian Xia, Hui-Peng Lv\* and Wei-Qiang Liao\*

Ordered Matter Science Research Center, Nanchang University, Nanchang 330031, People's Republic of China.

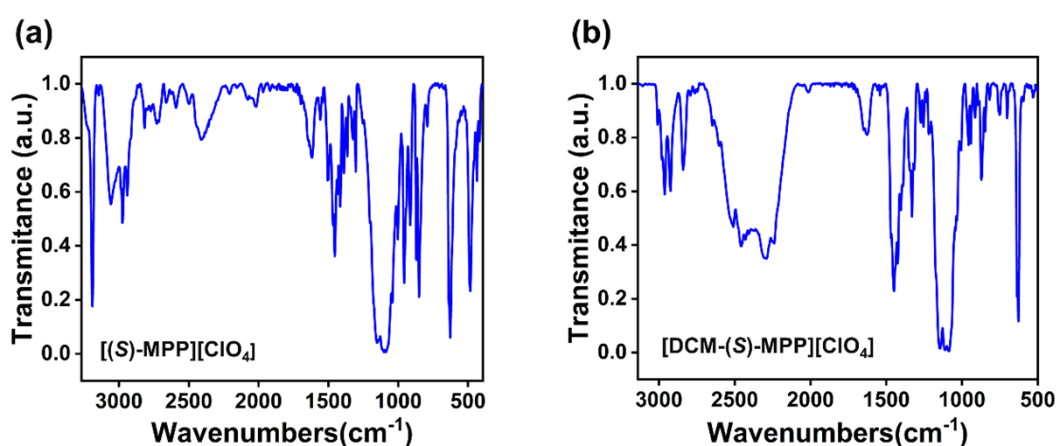

**Fig. S1.** The infrared absorption spectrums of [(S)-MPP][ClO<sub>4</sub>] (a) and [DCM-(S)-MPP][ClO<sub>4</sub>] (b), at room temperature.

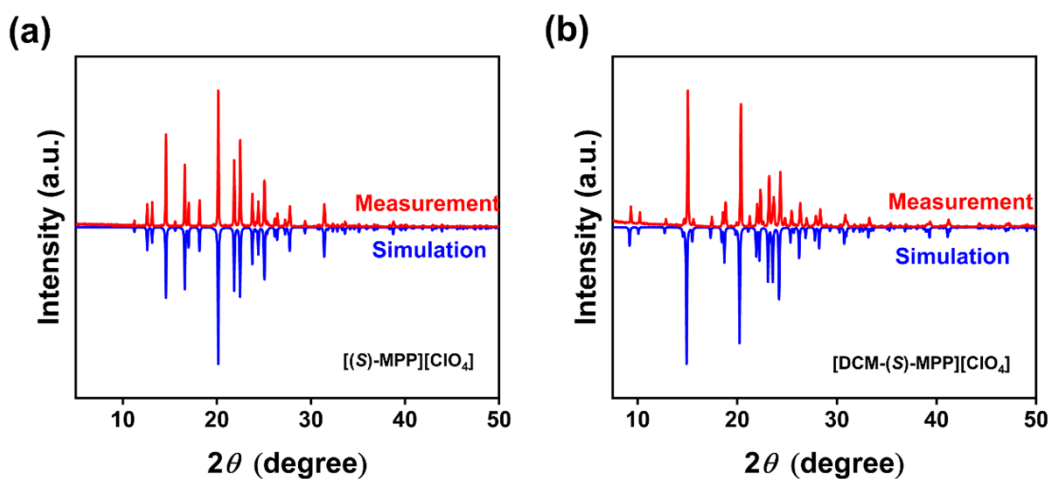

**Fig. S2.** The PXRD patterns of [(S)-MPP][ClO<sub>4</sub>] (a) and [DCM-(S)-MPP][ClO<sub>4</sub>] (b), at room temperature.

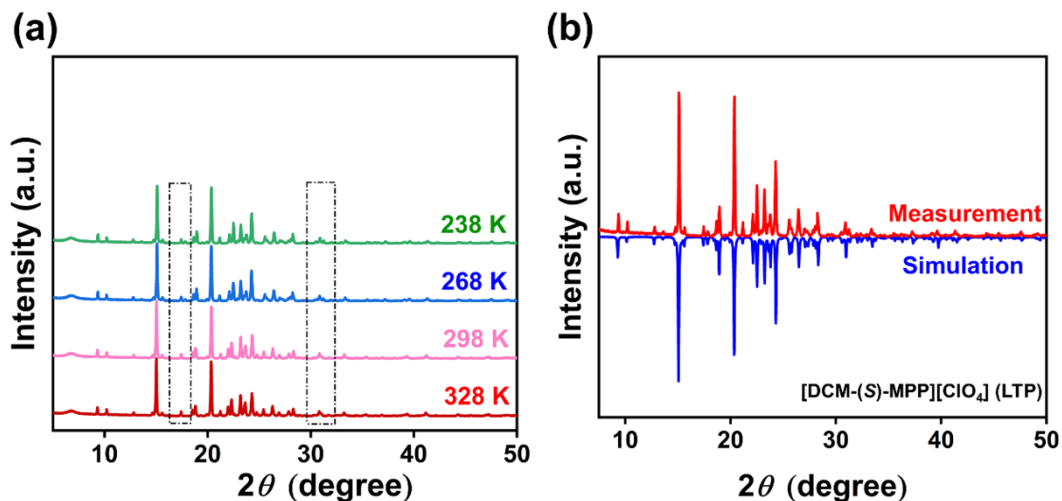

**Fig. S3.** The Variable-temperature PXRD patterns of [DCM-(S)-MPP][ClO<sub>4</sub>] (a) and the PXRD patterns of [DCM-(S)-MPP][ClO<sub>4</sub>] at LTP (b).

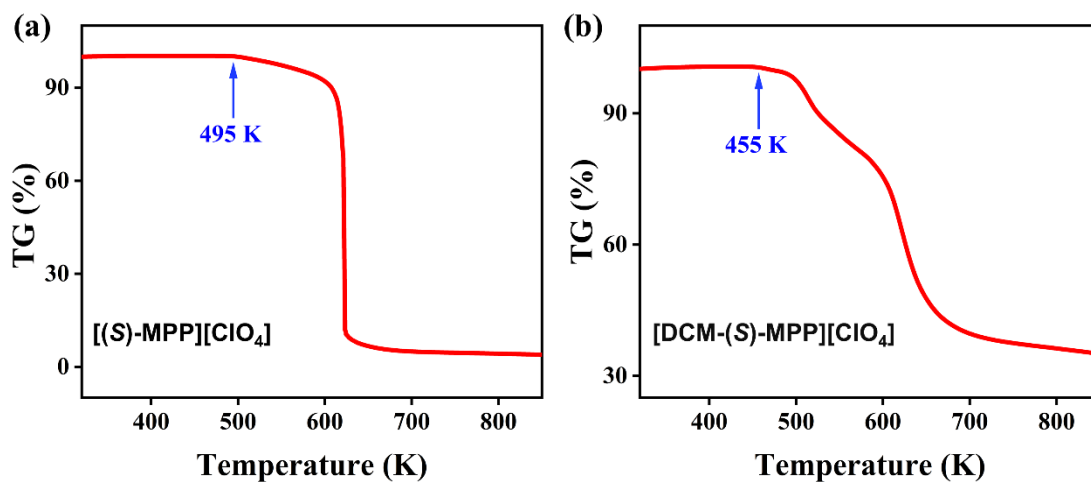

**Fig. S4.** Thermogravimetric analysis (TGA) curves of [(S)-MPP][ClO<sub>4</sub>] (a) and [DCM-(S)-MPP][ClO<sub>4</sub>] (b).

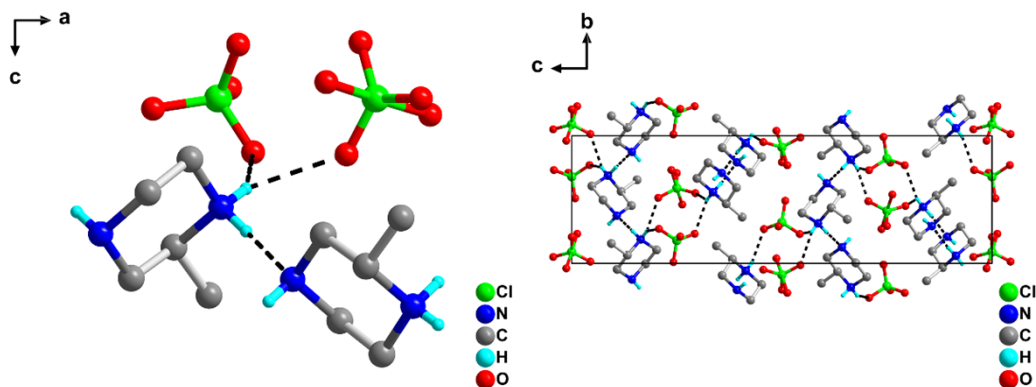

**Fig. S5.** Hydrogen bond diagram for [(S)-MPP][ClO<sub>4</sub>]. The black dotted lines represent hydrogen bonds. For clarity, some H atoms are omitted.

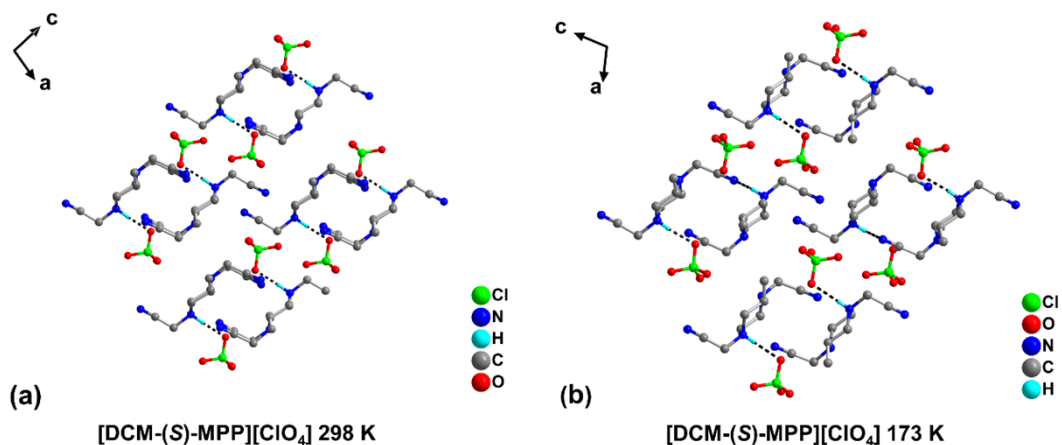

**Fig. S6.** Diagram of hydrogen bonding for [DCM-(S)-MPP][ClO<sub>4</sub>] at 298 K (a) and 173 K (b). The black dotted lines represent hydrogen bonds. For clarity, some H atoms are omitted.

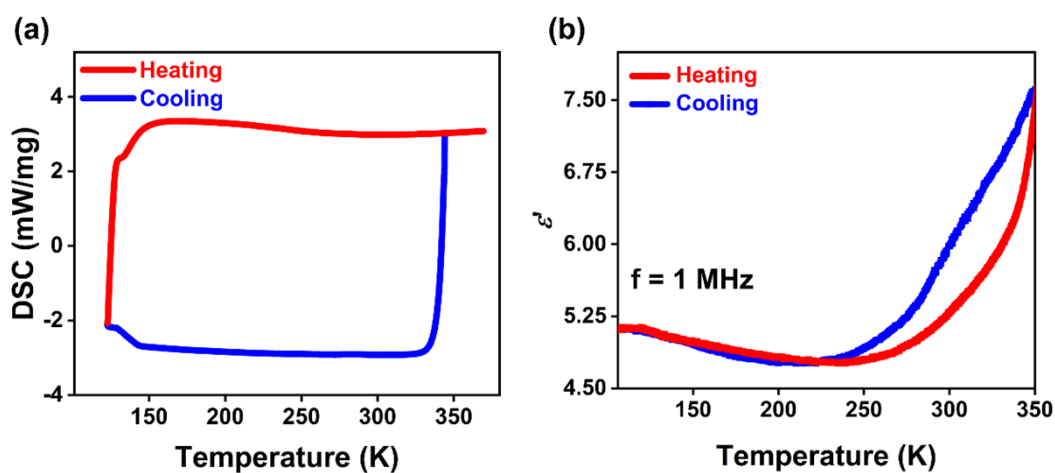

**Fig. S7.** (a) The DSC curves of [(S)-MPP][ClO<sub>4</sub>]; (b) temperature dependence of the real part ( $\epsilon'$ ) of [(S)-MPP][ClO<sub>4</sub>] at 1 MHz.

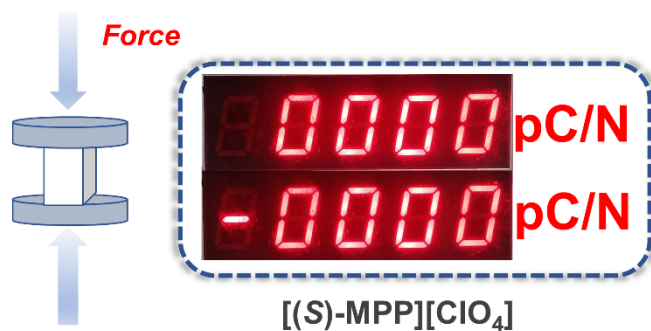

**Fig. S8.** The longitudinal piezoelectric coefficient value of [(S)-MPP][ClO<sub>4</sub>].

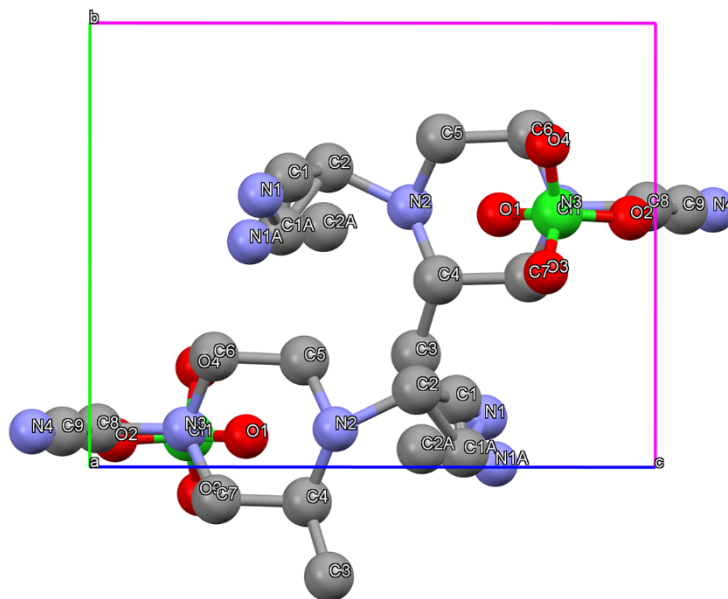

**Fig. S9.** Distribution of [DCM-(*S*)-MPP]<sup>+</sup> cations and [ClO<sub>4</sub>]<sup>-</sup> anions of [DCM-(*S*)-MPP][ClO<sub>4</sub>] at 298 K in a unit cell.

According to the crystal structure data collected at 298 K, we select a unit cell and assume that the centers of the positive charges of the [DCM-(*S*)-MPP]<sup>+</sup> cations and the negative charges of the [ClO<sub>4</sub>]<sup>-</sup> anions are located on the N atoms and Cl atoms, respectively, based on the point-charge model. The spontaneous polarization  $P_s$  has been estimated to be  $0.54 \mu\text{C cm}^{-2}$ .

| Atoms | Atom coordinate                             | Coordinate of charge center |
|-------|---------------------------------------------|-----------------------------|
| Cl    | Cl1 <sup>1</sup> (0.28735, 0.5706, 0.82607) | (0.5, 0.3206, 0.5)          |
|       | Cl1 <sup>2</sup> (0.71265, 0.0706, 0.17393) |                             |
| N     | N3 <sup>1</sup> (0.7027, 0.5849, 0.8318)    | (0.5, 0.3349, 0.5)          |
|       | N3 <sup>2</sup> (0.2973, 0.0849, 0.1682)    |                             |

$$\begin{aligned}
 P_s &= \lim \frac{1}{V} \sum q_i r_i \\
 &= [(-e \times 0.3206) + (e \times 0.3349)] \times 2 \times b / V \\
 &= (0.0143 \times 2 \times 7.5471 \times 10^{-10} \times 1.602 \times 10^{-19} \text{ C m}) / (642.596 \times 10^{-30} \text{ m}^3) \\
 &= 5.4 \times 10^{-3} \text{ C m}^{-2} \\
 &= 0.54 \mu\text{C cm}^{-2}
 \end{aligned}$$

**Table S1.** Crystal data and structure refinements for [(*S*)-MPP][ClO<sub>4</sub>] at 173 K and [DCM-(*S*)-MPP][ClO<sub>4</sub>] at 173 K and 298 K.

| Temperature                              | [( <i>S</i> )-MPP][ClO <sub>4</sub> ]                          | [DCM-( <i>S</i> )-MPP][ClO <sub>4</sub> ]                      |                                                                |
|------------------------------------------|----------------------------------------------------------------|----------------------------------------------------------------|----------------------------------------------------------------|
|                                          | 173 K                                                          | 173 K                                                          | 298 K                                                          |
| Empirical formula                        | C <sub>5</sub> H <sub>13</sub> ClN <sub>2</sub> O <sub>4</sub> | C <sub>9</sub> H <sub>15</sub> ClN <sub>4</sub> O <sub>4</sub> | C <sub>9</sub> H <sub>15</sub> ClN <sub>4</sub> O <sub>4</sub> |
| Weight                                   | 200.62                                                         | 278.70                                                         | 278.70                                                         |
| Crystal system                           | tetragonal                                                     | monoclinic                                                     | monoclinic                                                     |
| Space group                              | <i>P</i> 4 <sub>3</sub> 2 <sub>1</sub> 2                       | <i>P</i> 2 <sub>1</sub>                                        | <i>P</i> 2 <sub>1</sub>                                        |
| <i>a</i> /Å                              | 8.1484(2)                                                      | 13.9407(7)                                                     | 8.8528(6)                                                      |
| <i>b</i> /Å                              | 8.1484(2)                                                      | 7.4715(4)                                                      | 7.5471(7)                                                      |
| <i>c</i> /Å                              | 26.8449(11)                                                    | 18.8287(9)                                                     | 9.7043(8)                                                      |
| $\alpha$ /°                              | 90                                                             | 90                                                             | 90                                                             |
| $\beta$ /°                               | 90                                                             | 106.620(5)                                                     | 97.654(7)                                                      |
| $\gamma$ /°                              | 90                                                             | 90                                                             | 90                                                             |
| Volume/Å <sup>3</sup>                    | 1782.41(11)                                                    | 1879.23(17)                                                    | 642.60(9)                                                      |
| <i>Z</i>                                 | 8                                                              | 6                                                              | 2                                                              |
| <i>R</i> 1 [ <i>I</i> >2σ( <i>I</i> )]   | 0.0407                                                         | 0.0547                                                         | 0.0754                                                         |
| w <i>R</i> 2 [ <i>I</i> >2σ( <i>I</i> )] | 0.1015                                                         | 0.1406                                                         | 0.2139                                                         |
| GOF                                      | 1.043                                                          | 0.920                                                          | 1.051                                                          |

**Table S2.** Selected bond lengths and angles of hydrogen bonding for [(*S*)-MPP][ClO<sub>4</sub>] at 173 K.

| D—H⋯A                  | D—H (Å) | H⋯A (Å) | D⋯A (Å)  | D—H⋯A (°) |
|------------------------|---------|---------|----------|-----------|
| N1—H1A⋯O1              | 0.84(4) | 2.29(4) | 2.985(4) | 141(3)    |
| N1—H1A⋯O5 <sup>1</sup> | 0.84(4) | 2.30(4) | 2.890(4) | 128(3)    |
| N1—H1B⋯N2 <sup>2</sup> | 0.92(4) | 1.97(4) | 2.875(3) | 172(3)    |

**Table S3.** Selected bond lengths and angles of hydrogen bonding for [DCM-(*S*)-MPP][ClO<sub>4</sub>] at 173 K and 298 K.

|       | D—H⋯A      | D—H (Å) | H⋯A (Å) | D⋯A (Å)  | D—H⋯A (°) |
|-------|------------|---------|---------|----------|-----------|
| 173 K | N7—H7⋯N4   | 1.00    | 2.25    | 3.001(5) | 130.7     |
|       | N10—H10⋯O9 | 1.00    | 1.98    | 2.893(4) | 151.3     |
|       | N2—H2⋯O4   | 1.00    | 1.81    | 2.791(4) | 166.1     |
| 298 K | N3—H3⋯O1   | 0.98    | 1.87    | 2.847(5) | 176.2     |

**Table S4.** Selected bond angles [°] for compound [DCM-(*S*)-MPP][ClO<sub>4</sub>] at 173 K and 298 K.

| 173 K       |          | 298 K     |           |
|-------------|----------|-----------|-----------|
| C4—N2—C2    | 112.6(3) | C4—N2—C2  | 131.3(3)  |
| C2—N2—C3    | 112.6(3) | C4—N2—C2A | 99.7(4)   |
| C8—N3—C5    | 112.1(4) | C5—N2—C2  | 88.69(19) |
| C8—N3—C6    | 113.0(4) | C5—N2—C2A | 124.9(4)  |
| C11—N6—C12  | 110.6(3) | C7—N3—C8  | 113.0(6)  |
| C11—N6—C13  | 113.0(3) | C6—N3—C8  | 110.1(6)  |
| C17—N7—C16  | 111.8(3) |           |           |
| C17—N7—C15  | 113.7(3) |           |           |
| C21—N10—C20 | 113.7(3) |           |           |
| C22—N10—C20 | 111.2(3) |           |           |
| C24—N11—C26 | 114.2(4) |           |           |
| C26—N11—C23 | 110.5(4) |           |           |
